# Supplementary material for: Performance evaluation of in-source ion activation hardware for collision-induced unfolding of proteins and protein complexes on a drift tube ion mobility-mass spectrometer
Source: Royal Society of Chemistry journal article supplement (doi:10.1039/d2an01452a), 2022-12-13
Supplement: d2an01452a1.pdf [file d2an01452a1.pdf]

# Performance Evaluation of In-source Ion Activation Hardware and Collision-Induced Unfolding of Proteins and Protein Complexes on a Drift Tube Ion Mobility-Mass Spectrometer

## Supplementary Information

Varun V. Gadkari<sup>1,a</sup>, Brock R. Juliano<sup>1</sup>, Christopher S. Mallis<sup>2,b</sup>, Jody C. May<sup>3</sup>, Ruwan T. Kurulugama<sup>4</sup>, John C. Fjeldsted<sup>4</sup>, John A. McLean<sup>3</sup>, David H. Russell<sup>2</sup>, Brandon T. Ruotolo<sup>1,‡</sup>

<sup>1</sup>Department of Chemistry, University of Michigan, Ann Arbor, Michigan 48109, U.S.A.

<sup>2</sup>Department of Chemistry, Texas A&M University, College Station, Texas 77843, U.S.A.

<sup>3</sup>Center for Innovative Technology, Department of Chemistry, Vanderbilt Institute of Chemical Biology, Vanderbilt Institute for Integrative Biosystems Research and Education, Vanderbilt-Ingram Cancer Center, Vanderbilt University, Nashville, Tennessee 37235, U.S.A.

<sup>4</sup>Agilent Technologies Inc., Santa Clara, California 95051, U.S.A.

<sup>4</sup>Agilent Technologies Inc., Santa Clara, California 95051, U.S.A.

<sup>a</sup>Current Affiliation: Department of Chemistry, University of Minnesota, Minneapolis, MN 55455, U.S.A.

<sup>b</sup>Current Affiliation: Shimadzu Scientific Instruments, Baltimore, Maryland 21201, U.S.A.

<sup>‡</sup>Corresponding Author: bruotolo@umich.edu

|        |           |                                                                                    |
|--------|-----------|------------------------------------------------------------------------------------|
| Pg. 2  | Table S1  | Protein Standards                                                                  |
| Pg. 3  | Table S2  | Optimized Instrument Parameters for Native Conditions                              |
| Pg. 4  | Table S3  | CIUSuite2 Data Processing Parameters                                               |
| Pg. 5  | Table S4  | Inter-Laboratory R.M.S.D. Values for Ubiquitin, Myoglobin, Streptavidin, and BSA   |
| Pg. 6  | Table S5  | <sup>DT</sup> CCS <sub>N2</sub> Values from this study, and referenced literature  |
| Pg. 7  | Table S6  | Production-grade Source RMSD, Feature and CIU50 Reproducibility of BSA             |
| Pg. 8  | Table S6  | Production-grade Source RMSD, Feature and CIU50 Reproducibility of SigmaMAb (IgG1) |
| Pg.9   | Figure S1 | Complete Agilent 6560 DTIM-MS Instrument Schematic                                 |
| Pg. 10 | Figure S2 | Native Mass Spectra of Proteins in Inter-Laboratory study                          |
| Pg. 11 | Figure S3 | CIU feature fits for ubiquitin, myoglobin, streptavidin, and SigmaMAb              |

**Table S1** – Protein Standards Used in This Work

| <b>Protein</b>                                 | <b>Product Number</b> | <b>Molecular Weight (kDa)</b> |
|------------------------------------------------|-----------------------|-------------------------------|
| SiLu Lite SigmaMAb Standard antibody           | MSQC4                 | 150                           |
| Bovine Serum Albumin                           | A2153                 | 66.5                          |
| Streptavidin from <i>Streptomyces Avidinii</i> | S0677                 | 52.8                          |
| Myoglobin from equine heart                    | M1182                 | 17.6                          |
| Ubiquitin from bovine erythrocytes             | U6253                 | 8.6                           |

**Table S2 – Optimized Instrument Parameters for Native Conditions**

| Region              | Setting Name                                      | Default | Native Ubiquitin | Native Myoglobin, Streptavidin, BSA | Native IgG Production Grade |
|---------------------|---------------------------------------------------|---------|------------------|-------------------------------------|-----------------------------|
| Source              | Sample Infusion Rate ( $\mu\text{L}/\text{min}$ ) | n/a     | 2-5              | 2-5                                 | 2-5                         |
|                     | Gas Temp (deg. C)                                 | 325     | 140              | 140                                 | 250                         |
|                     | Drying Gas (L/min)                                | 5       | 5                | 5                                   | 5                           |
|                     | Nebulizer Pressure (psi)                          | 20      | 35               | 20                                  | 20                          |
|                     | Sheath Gas Temp (deg. C)                          | 275     | 140              | 140                                 | 140                         |
|                     | Sheath Gas Flow (L/min)                           | 10      | 8                | 11                                  | 11                          |
|                     | VCap, Capillary Voltage (V)                       | 4000    | 3000             | 2500-3000                           | 3000                        |
|                     | Nozzle Voltage (V)                                | 2000    | 2000             | 2000                                | 2000                        |
|                     | Fragmentor (V)                                    | 400     | 400              | 400                                 | 400                         |
| Pressures           | High Pressure Funnel (Torr)                       | 4.00    | 4.80             | 4.80                                | 4.10-4.30                   |
|                     | Trapping Funnel (Torr)                            | 3.80    | 3.80             | 3.80                                | 3.80                        |
|                     | Drift Tube (Torr)                                 | 3.95    | 3.95             | 3.95                                | 3.95                        |
| Acquisition         | Max Drift Time (ms)                               | n/a     | 90               | 90                                  | 90                          |
|                     | Trap Fill Time ( $\mu\text{s}$ )                  | 20000   | 80000            | 80000                               | 80000                       |
|                     | Trap Release Time ( $\mu\text{s}$ )               | 150     | 1000             | 1000                                | 1000                        |
| Advanced Parameters | In-Source CE (V)                                  | 20      | 10 - 200         | 10 - 450                            | 10-410                      |
|                     | High Pressure Funnel Delta (V)                    | 150     | 50               | 150                                 | 180                         |
|                     | High Pressure Funnel Radio Frequency (Vpp)        | 150     | 50               | 150                                 | 200                         |
|                     | Trapping Funnel Delta (V)                         | 180     | 160              | 164                                 | 164                         |
|                     | Trapping Funnel Radio Frequency (Vpp)             | 150     | 180              | 150                                 | 200                         |

**Table S3 – CIUSuite2 Data Processing Parameters**

|                        |                                                            | <b>Ubiquitin<br/>+6</b>                 | <b>Myoglobin<br/>+8</b>                 | <b>Streptavidin<br/>+11</b>             | <b>BSA +16</b>                          | <b>SigmaMAb</b>                    |
|------------------------|------------------------------------------------------------|-----------------------------------------|-----------------------------------------|-----------------------------------------|-----------------------------------------|------------------------------------|
| <b>Data Import</b>     | <b>Smoothing<br/>Savitzky-Golay</b>                        | Window: 5;<br>Iteration: 1<br>(Default) | Window: 5;<br>Iteration: 1<br>(Default) | Window: 5;<br>Iteration: 1<br>(Default) | Window: 5;<br>Iteration: 1<br>(Default) | Window: 7<br>Iteration: 1          |
|                        | <b>Crop</b>                                                | 10-200 V<br>10-20 nm <sup>2</sup>       | 10-240 V<br>15-35 nm <sup>2</sup>       | 100-440 V<br>30-50 nm <sup>2</sup>      | 10-410 V<br>40-70 nm <sup>2</sup>       | 10-410 V<br>70-140 nm <sup>2</sup> |
|                        | <b>Plot Options</b>                                        | Default                                 | Default                                 | Default                                 | Default                                 | Default                            |
| <b>Feature Fitting</b> | <b>Mode</b>                                                | Standard<br>(Default)                   | Standard<br>(Default)                   | Standard<br>(Default)                   | Standard<br>(Default)                   | Standard<br>(Default)              |
|                        | <b>Minimum Feature Length<br/>[x-axis] (Data Points)</b>   | 5<br>(Default)                          | 2                                       | 4                                       | 2                                       | 4-6                                |
|                        | <b>Feature Width [y-axis]<br/>Allowed (nm<sup>2</sup>)</b> | 1                                       | 1                                       | 1                                       | 1.5                                     | 2-4                                |
|                        | <b>Max CV Gap</b>                                          | 0<br>(Default)                          | 0<br>(Default)                          | 0<br>(Default)                          | 0<br>(Default)                          | 0<br>(Default)                     |
| <b>CIU50 Fitting</b>   | <b>Mode</b>                                                | Standard<br>(Default)                   | Standard<br>(Default)                   | Standard<br>(Default)                   | Standard<br>(Default)                   | Standard<br>(Default)              |
|                        | <b>Trans. Region Padding</b>                               | 15<br>(Default)                         | 15<br>(Default)                         | 15<br>(Default)                         | 15 (Default)                            | 15<br>(Default)                    |
|                        | <b>Max CV Gap</b>                                          | 0<br>(Default)                          | 0<br>(Default)                          | 0<br>(Default)                          | 0<br>(Default)                          | 0<br>(Default)                     |

**Table S4** – Inter-Laboratory RMSD Values for Ubiquitin, Myoglobin, Streptavidin, and BSA

| <u>Ion</u>              | <u>CIU Reproducibility RMSD (%)</u> |             |           |                         |
|-------------------------|-------------------------------------|-------------|-----------|-------------------------|
|                         | <u>UM</u>                           | <u>TAMU</u> | <u>VU</u> | <u>Inter-laboratory</u> |
| <b>Ubiquitin +6</b>     | 3.8 ± 1.4                           | 2.5 ± 0.6   | 1.9 ± 0.4 | 18 ± 2                  |
| <b>Myoglobin +8</b>     | 3.7 ± 0.6                           | 2.9 ± 0.5   | 1.9 ± 0.2 | 37 ± 11                 |
| <b>Streptavidin +11</b> | 1.0 ± 0.1                           | 2.3 ± 0.4   | 4.4 ± 0.4 | 20 ± 6                  |
| <b>BSA +16</b>          | 2.2 ± 0.3                           | 2.6 ± 0.3   | 3.0 ± 0.3 | 18 ± 4                  |

**Table S5** –  $^{DT}CCS_{N_2}$  Values from this study, and referenced literature

|                       |    | $^{DT}CCS_{N_2}$ values reported for each protein ( $\text{\AA}^2$ ) <sup>a.</sup> |                                                          |                                          |                                                          |                            |                                |                             |
|-----------------------|----|------------------------------------------------------------------------------------|----------------------------------------------------------|------------------------------------------|----------------------------------------------------------|----------------------------|--------------------------------|-----------------------------|
|                       |    | <sup>1</sup> 2018<br><i>May et al.</i>                                             | <sup>2</sup> 2020<br><i>Stiving et al.</i> <sup>b.</sup> | <sup>3</sup> 2020<br><i>Zheng et al.</i> | <sup>4</sup> 2020<br><i>Gadkari et al.</i> <sup>c.</sup> | <i>Lit.</i><br><i>Avg.</i> | <i>This work</i> <sup>d.</sup> | <i>% Bias</i> <sup>e.</sup> |
| Ubiquitin<br>(+6)     | F1 | 1220±10 (3)                                                                        | --                                                       | 1210±10 (3)                              | 1190±10 (3)                                              | 1210 (3)                   | 1220±10 (4), 0.9%              | 0.5%                        |
|                       | F2 | 1470±20 (4)                                                                        | --                                                       | --                                       | 1350±10 (3)                                              | 1410 (2)                   | 1430±40 (4), 2.6%              | 1.5%                        |
|                       | F3 | 1630±10 (5)                                                                        | --                                                       | --                                       | 1470±10 (3)                                              | 1550 (2)                   | 1660±10 (3), 0.7%              | 6.5%                        |
|                       | F4 | --                                                                                 | 1730±10 (3)                                              | --                                       | --                                                       | 1730 (1)                   | 1730±10 (2), 0.3%              | 0.0%                        |
| Myoglobin<br>(+8)     | F1 | 1940±30 (5)                                                                        | --                                                       | --                                       | --                                                       | 1940 (1)                   | 1970±10 (4), 0.5%              | 1.6%                        |
|                       | F2 | --                                                                                 | --                                                       | --                                       | --                                                       | --                         | 2110±50 (3), 2.4%              | --                          |
|                       | F3 | --                                                                                 | --                                                       | --                                       | --                                                       | --                         | 2730±30 (4), 1.0%              | --                          |
| Streptavidin<br>(+11) | F1 | --                                                                                 | 3760±40 (3)                                              | --                                       | --                                                       | 3760 (1)                   | 3680±10 (4), 0.2%              | 2.1%                        |
|                       | F2 | --                                                                                 | --                                                       | --                                       | --                                                       | --                         | 3520±10 (3), 0.3%              | --                          |
|                       | F3 | --                                                                                 | --                                                       | --                                       | --                                                       | --                         | 4350±20 (4), 0.4%              | --                          |
| BSA<br>(+16)          | F1 | --                                                                                 | 4510±40 (3)                                              | --                                       | 4530±20 (3)                                              | 4520 (2)                   | 4520±50 (4), 1.2%              | 0.0%                        |
|                       | F2 | --                                                                                 | --                                                       | --                                       | --                                                       | --                         | 5360±40 (3), 0.7%              | --                          |
|                       | F3 | --                                                                                 | --                                                       | --                                       | --                                                       | --                         | 5760±40 (4), 0.7%              | --                          |
|                       | F4 | --                                                                                 | --                                                       | --                                       | --                                                       | --                         | 6150±70 (4), 1.1%              | --                          |
|                       | F5 | --                                                                                 | --                                                       | --                                       | --                                                       | --                         | 6410±60 (4), 0.9%              | --                          |
| IgG1<br>(+26)         | F1 | --                                                                                 | --                                                       | --                                       | --                                                       | --                         | 7980±300 (4), 3.2%             | --                          |
|                       | F2 | --                                                                                 | --                                                       | --                                       | --                                                       | --                         | 9000±90 (2), 0.9%              | --                          |
|                       | F3 | --                                                                                 | --                                                       | --                                       | --                                                       | --                         | 10000±200 (4), 2.4%            | --                          |
|                       | F4 | --                                                                                 | --                                                       | --                                       | --                                                       | --                         | 10410±80 (4), 0.8%             | --                          |
|                       | F5 | --                                                                                 | --                                                       | --                                       | --                                                       | --                         | 10700±200 (3), 1.8%            | --                          |

a. Number of measurements are indicated in the parenthesis. Percent RSDs, when reported, are converted to standard deviations in  $\text{\AA}^2$ .

b. The CCS values reported for ammonium acetate solution are used for ubiquitin, and BSA, and the value measured in TEAA solution is used for streptavidin. For ubiquitin, only one CCS value is reported for the +6 charge state and it is assumed this is the fully-extended conformer. The streptavidin +11 and BSA +16 values are assumed to be the lowest-energy states. CCS measurements were obtained with nano-ESI on a traveling wave ion mobility-mass spectrometer.

c. The CCS values for ubiquitin are assumed to correspond to F1, F2, and F3 in this study. CCS measurements were obtained with nano-ESI.

d. The interlaboratory relative standard deviations are also provided at the end of each entry. In some cases, not all features were observed across all laboratories/hardware configurations.

e. The percent bias is referenced against the CCS values obtained in this study.

**Table S6 – Production-grade Source RMSD, Feature and CIU50 Reproducibility of BSA**

| <b>Production Grade RMSD Analysis</b>                                                                                                                                                       |                                                                      |
|---------------------------------------------------------------------------------------------------------------------------------------------------------------------------------------------|----------------------------------------------------------------------|
| <b><u>Source Assembly</u></b>                                                                                                                                                               | <b><u>RMSD (%)</u></b>                                               |
| <b>Production Grade 1 (PG1)</b>                                                                                                                                                             | 2.4 ± 0.1                                                            |
| <b>Production Grade 2 (PG2)</b>                                                                                                                                                             | 2.3 ± 0.1                                                            |
| <b>Production Grade 3 (PG3)</b>                                                                                                                                                             | 2.6 ± 0.1                                                            |
| <b>Inter-Hardware Reproducibility</b>                                                                                                                                                       | 5 ± 1                                                                |
| <b>Average Feature <sup>DTCCS</sup>N<sub>2</sub> Measurements Across Production Grade Assemblies</b><br>3 Replicates: 3 Averaged CIU Fingerprints from PG1, PG2, PG3; R.S.D. in parentheses |                                                                      |
| <b><u>Feature #</u></b>                                                                                                                                                                     | <b><u>Average <sup>DTCCS</sup>N<sub>2</sub> (nm<sup>2</sup>)</u></b> |
| <b>Feature 1</b>                                                                                                                                                                            | 45.09 ± 0.02 (0.04%)                                                 |
| <b>Feature 2</b>                                                                                                                                                                            | 53.8 ± 0.1 (0.2%)                                                    |
| <b>Feature 3</b>                                                                                                                                                                            | 57.7 ± 0.1 (0.2%)                                                    |
| <b>Feature 4</b>                                                                                                                                                                            | 61.6 ± 0.2 (0.3%)                                                    |
| <b>Feature 5</b>                                                                                                                                                                            | 64.6 ± 0.2 (0.3%)                                                    |
| <b>Average CIU50 Measurements Across Production Grade Assemblies</b><br>3 Replicates: 3 Averaged CIU Fingerprints from PG1, PG2, PG3; R.S.D. in parentheses                                 |                                                                      |
| <b><u>Transition #</u></b>                                                                                                                                                                  | <b><u>Average CIU50 (V)</u></b>                                      |
| <b>CIU50-1</b>                                                                                                                                                                              | 174 ± 5 (3%)                                                         |
| <b>CIU50-2</b>                                                                                                                                                                              | 200.0 ± 0.4 (0.2%)                                                   |
| <b>CIU50-3</b>                                                                                                                                                                              | 251 ± 7 (3%)                                                         |
| <b>CIU50-4</b>                                                                                                                                                                              | 348 ± 3 (1%)                                                         |

Table S7 – Production Production-grade Source RMSD, Feature and CIU50 Reproducibility of SigmaMAb

| Production Grade RMSD Analysis                                                                                                                                                              |                                                            |                         |                          |                          |                         |
|---------------------------------------------------------------------------------------------------------------------------------------------------------------------------------------------|------------------------------------------------------------|-------------------------|--------------------------|--------------------------|-------------------------|
| Source Assembly                                                                                                                                                                             | RMSD (%)                                                   |                         |                          |                          |                         |
|                                                                                                                                                                                             | +26                                                        | +27                     | +28                      | +29                      | +30                     |
| Production Grade 1 (PG1)                                                                                                                                                                    | 4.70 ± 0.30                                                | 2.22 ± 0.02             | 1.92 ± 0.09              | 2.20 ± 0.10              | 3.10 ± 0.30             |
| Production Grade 2 (PG2)                                                                                                                                                                    | 4.60 ± 0.10                                                | 2.80 ± 0.10             | 1.80 ± 0.20              | 2.00 ± 0.20              | 3.40 ± 0.40             |
| Production Grade 3 (PG3)                                                                                                                                                                    | 5.00 ± 0.40                                                | 2.70 ± 0.10             | 1.87 ± 0.09              | 2.20 ± 0.10              | 3.20 ± 0.10             |
| Inter-Hardware Reproducibility                                                                                                                                                              | 4.40 ± 0.50                                                | 3.30 ± 0.70             | 2.60 ± 0.90              | 2.70 ± 0.40              | 3.50 ± 0.60             |
| <b>Average Feature <sup>DT</sup>CCS<sub>N2</sub> Measurements Across Production Grade Assemblies</b><br>3 Replicates: 3 Averaged CIU Fingerprints from PG1, PG2, PG3; R.S.D. in parentheses |                                                            |                         |                          |                          |                         |
| Feature #                                                                                                                                                                                   | Average <sup>DT</sup> CCS <sub>N2</sub> (nm <sup>2</sup> ) |                         |                          |                          |                         |
|                                                                                                                                                                                             | +26                                                        | +27                     | +28                      | +29                      | +30                     |
| Feature 1                                                                                                                                                                                   | 81.90 ± 0.40<br>(0.5%)                                     | 83.60 ± 0.40<br>(0.5%)  | 85.17 ± 0.04<br>(0.05%)  | 87.23 ± 0.02<br>(0.05%)  | 90.29 ± 0.04<br>(0.04%) |
| Feature 2                                                                                                                                                                                   | 97.60 ± 0.40<br>(0.4%)                                     | 110.20 ± 0.40<br>(0.4%) | 111.91 ± 0.01<br>(0.01%) | 116.83 ± 0.01<br>(0.01%) | 119.60 ± 0.50<br>(0.4%) |
| Feature 3                                                                                                                                                                                   | 107.00 ± 0.40<br>(0.4%)                                    |                         | 115.47 ± 0.01<br>(0.01%) |                          | 126.90 ± 0.50<br>(0.4%) |
| <b>Average CIU50 Measurements Across Production Grade Assemblies</b><br>3 Replicates: 3 Averaged CIU Fingerprints from PG1, PG2, PG3; R.S.D. in parentheses                                 |                                                            |                         |                          |                          |                         |
| Transition #                                                                                                                                                                                | Average CIU50 (V)                                          |                         |                          |                          |                         |
|                                                                                                                                                                                             | +26                                                        | +27                     | +28                      | +29                      | +30                     |
| CIU50-1                                                                                                                                                                                     | 201.6 ± 0.6<br>(0.3%)                                      | 211 ± 4<br>(2%)         | 203 ± 3<br>(1%)          | 200 ± 3<br>(2%)          | 191 ± 3<br>(2%)         |
| CIU50-2                                                                                                                                                                                     | 260 ± 8<br>(3%)                                            |                         | 335 ± 3<br>(1%)          |                          | 373 ± 4<br>(1%)         |



**Figure S1** – Modified Agilent 6560 Drift Tube Ion Mobility Quadrupole Time-of-Flight Mass Spectrometer (DTIM-QTOF)

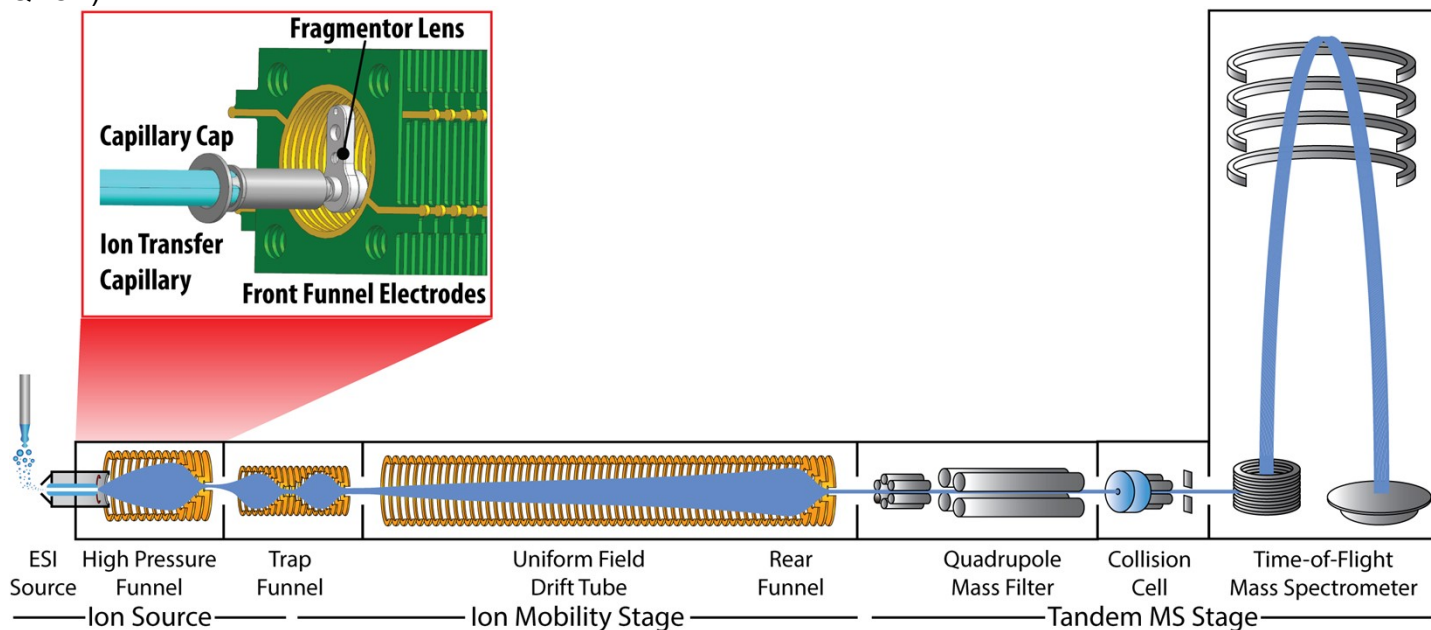

Full instrument diagram of the Modified Agilent 6560 DTIM-MS, now commercially referred to as the Agilent 6560C (diagram adapted from<sup>4</sup>). The capillary/high pressure funnel (4.8 torr) is modified to enable high-energy in-source activation of biomolecules for collision induced unfolding (CIU), as described in detail in the main text. After ion activation, the ions are accumulated in the trap funnel (3.80 torr) for a fixed amount of time (Trap Fill Time), and then released into the drift tube for mobility separation. The drift tube is operated at ambient temperature, 3.95 torr, and with an electric field of  $\sim 18$  V/cm. After mobility separation, ions traverse the tandem MS stage of the instrument where they can be isolated by the quadrupole mass filter, further activated in the collision cell, and/or detected by the time-of-flight mass spectrometer. The firmware of this instrument is upgraded to extend the mass range of the time-of-flight mass spectrometer to 20,000 m/z.

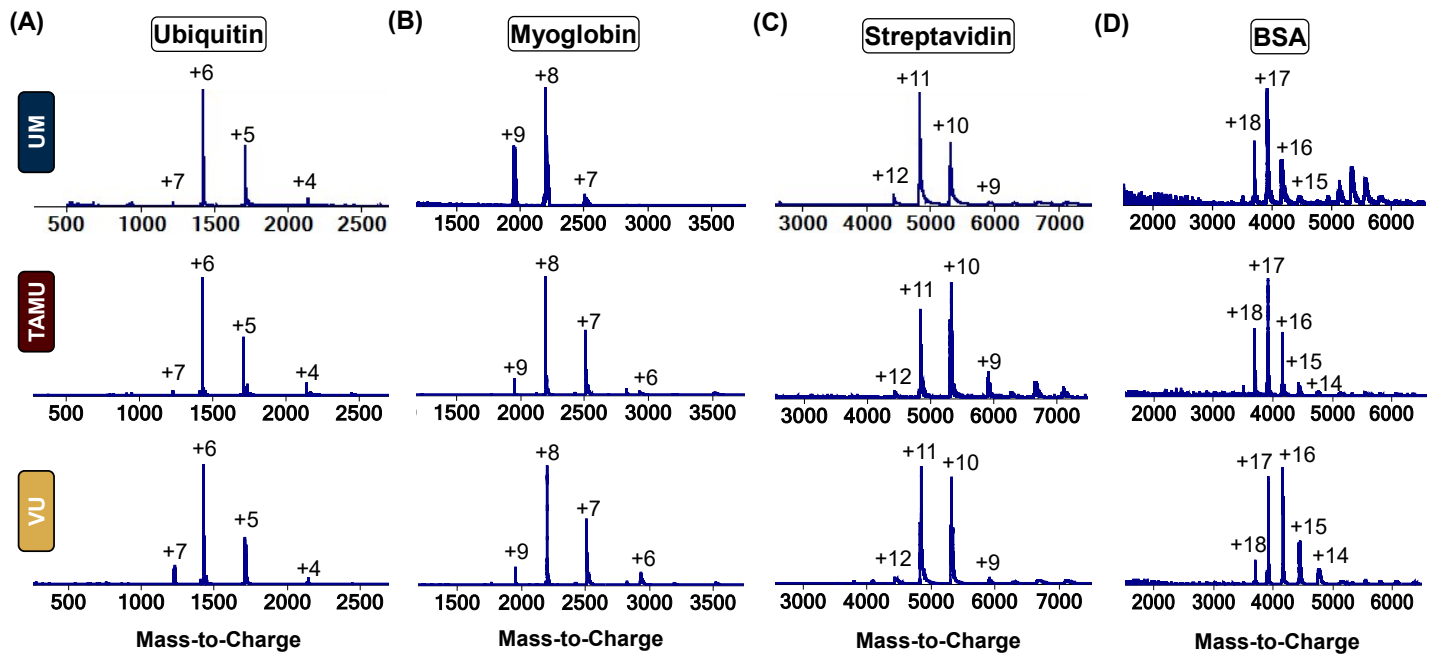

**Figure S2** – Native Mass Spectra of (A) Ubiquitin, (B) Myoglobin, (C) Streptavidin, and (D) Bovine Serum Albumin

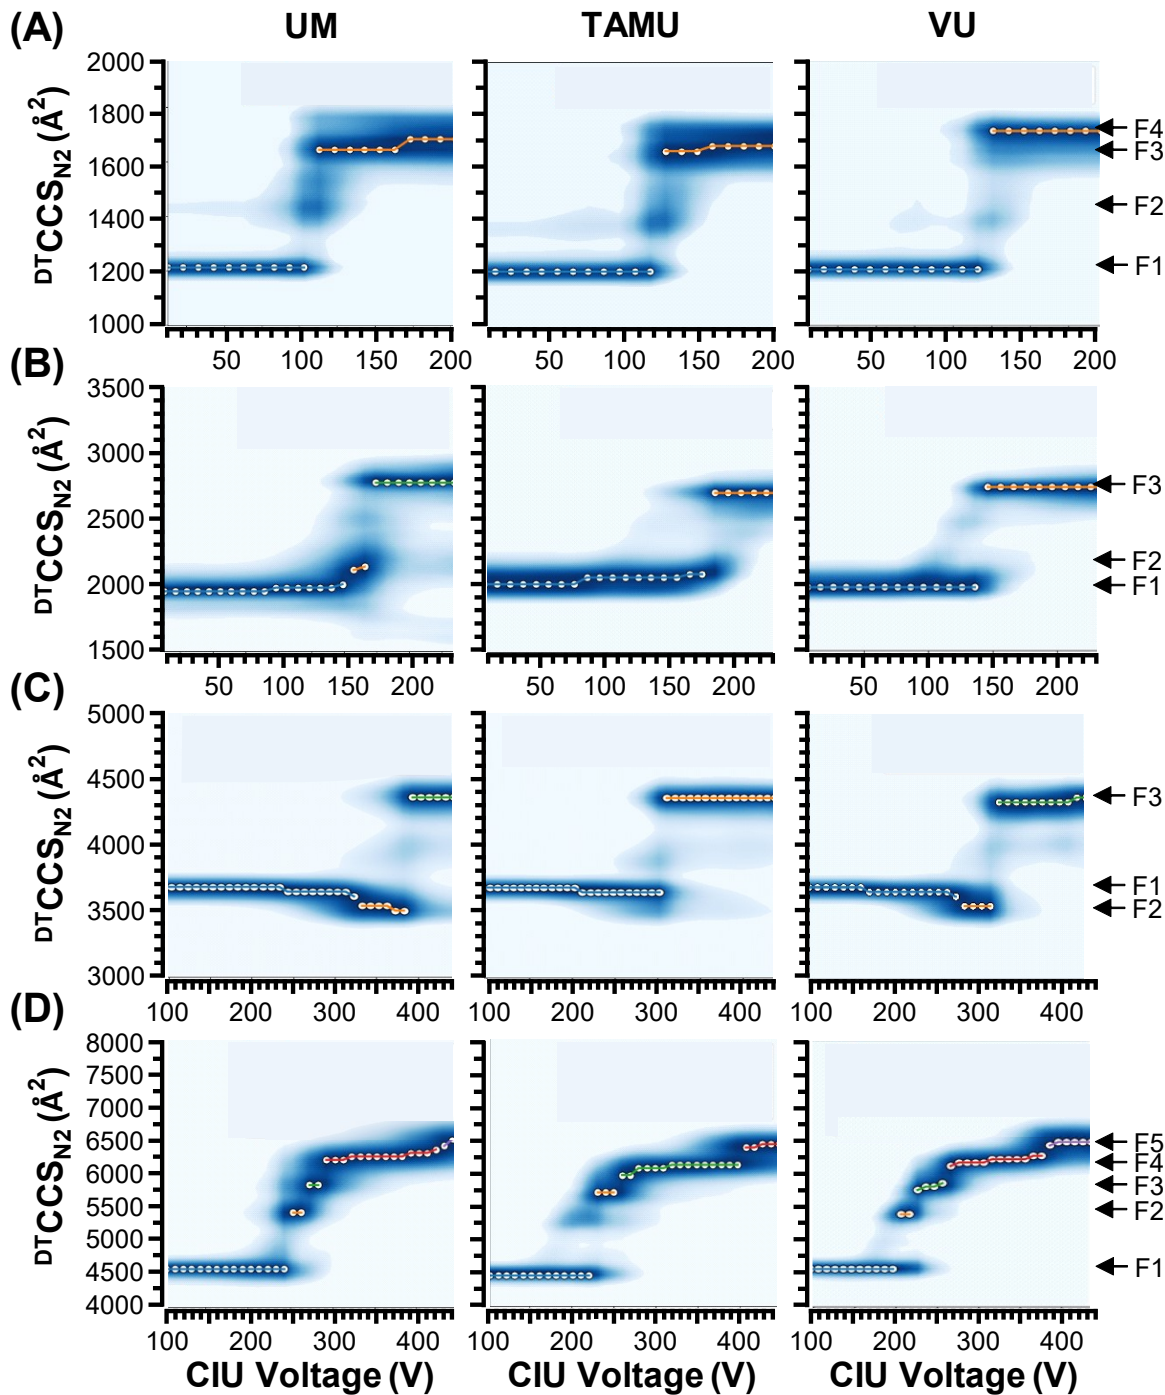

**Figure S3** – CIU feature maps. Here, the average map generated from three replicate runs is used for feature annotation, with “significant features” (F1, F2, etc.) determined using specific constraints for the CIU step size and allowable CCS tolerance. These are (A) ubiquitin (+6), 5 steps minimum, 1  $\text{nm}^2$  width tolerance; (B) myoglobin (+8), 2 steps, 1  $\text{nm}^2$ ; (C) streptavidin (+11), 4 steps 1  $\text{nm}^2$ ; (D) BSA (+16), 2 steps, 1.5  $\text{nm}^2$ .

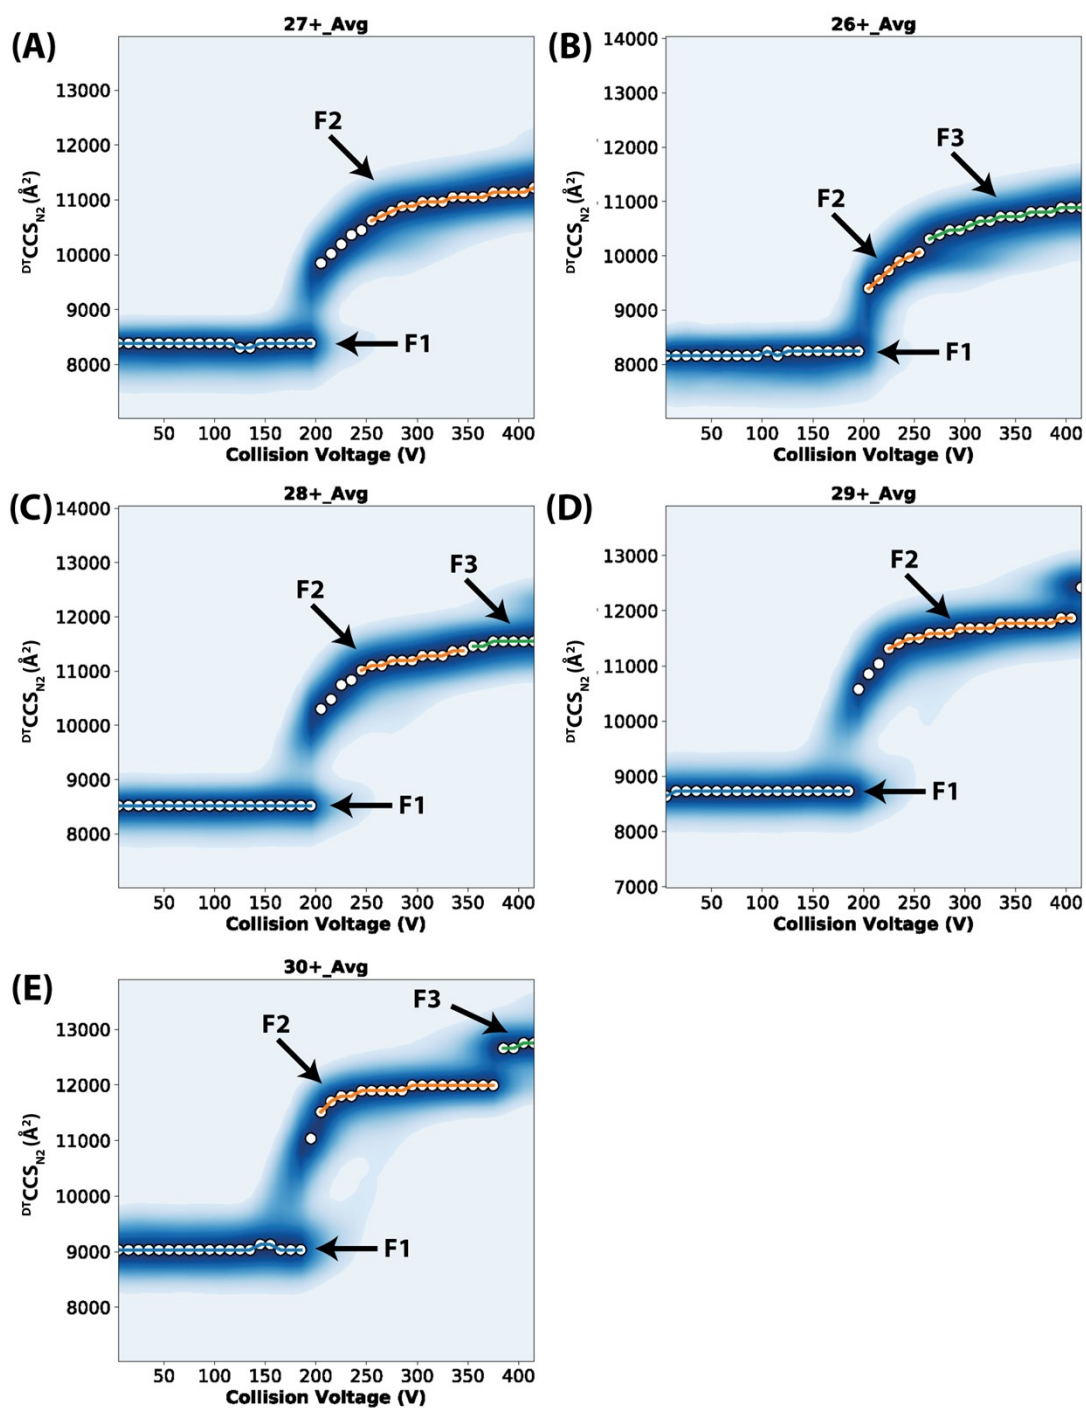

**Figure S4** – CIU feature Plots of SigmaMAb. The average CIU fingerprint generated from three replicate runs is used for feature annotation, with “significant features” (F1, F2, etc.) determined using specific constraints for the CIU step size and allowable CCS tolerance. These are **(A)** 26+, 6 steps minimum, 3.5 nm<sup>2</sup> width tolerance; **(B)** 27+, 6 steps minimum, 3.5 nm<sup>2</sup> width tolerance; **(C)** 28+, 4 steps minimum, 2 nm<sup>2</sup> width tolerance; **(D)** 29+, 4 steps minimum, 2 nm<sup>2</sup> width tolerance; **(E)** 30+, 4 steps minimum, 2 nm<sup>2</sup> width tolerance;

## References

- (1) May, J. C.; Jurneczko, E.; Stow, S. M.; Kratochvil, I.; Kalkhof, S.; McLean, J. A. Conformational Landscapes of Ubiquitin, Cytochrome c, and Myoglobin: Uniform Field Ion Mobility Measurements in Helium and Nitrogen Drift Gas. *International Journal of Mass Spectrometry* **2018**, *427*, 79–90. <https://doi.org/10.1016/j.ijms.2017.09.014>.
- (2) Stiving, A. Q.; Vanaernum, Z. L.; Busch, F.; Harvey, S. R.; Sarni, S. H.; Wysocki, V. H. Surface-Induced Dissociation: An Effective Method for Characterization of Protein Quaternary Structure. *Analytical Chemistry*. American Chemical Society January 2, 2019, pp 190–209. <https://doi.org/10.1021/acs.analchem.8b05071>.
- (3) Zheng, X.; Kurulugama, R. T.; Laganowsky, A.; Russell, D. H. Collision-Induced Unfolding Studies of Proteins and Protein Complexes Using Drift Tube Ion Mobility-Mass Spectrometer. *Analytical Chemistry* **2020**, *92* (10), 7218–7225. <https://doi.org/10.1021/acs.analchem.0c00772>.
- (4) Gadkari, V. v.; Ramírez, C. R.; Vallejo, D. D.; Kurulugama, R. T.; Fjeldsted, J. C.; Ruotolo, B. T. Enhanced Collision Induced Unfolding and Electron Capture Dissociation of Native-like Protein Ions. *Analytical Chemistry* **2020**, *92* (23), 15489–15496. <https://doi.org/10.1021/acs.analchem.0c03372>.
